# Supplementary material for: Tape-cast Ce-substituted Li7La3Zr2O12 electrolyte for improving electrochemical performance of solid-state lithium batteries
Source: Royal Society of Chemistry journal article supplement (doi:10.1039/d2ta06808g), 2022-01-01
Supplement: d2ta06808g1.pdf [file d2ta06808g1.pdf]

## Tape-cast Ce-substituted $\text{Li}_7\text{La}_3\text{Zr}_2\text{O}_{12}$ Electrolyte for Improving Electrochemical Performance of Solid-State Lithium Batteries

Purna Chandra Rath, Yu-Syuan Jheng, Cheng-Chia Chen, Chih-Long Tsai, Yu-Sheng Su,  
Chun-Chen Yang, Rüdiger-A. Eichel, Chien-Te Hsieh, Tai-Chou Lee, Jeng-Kuei Chang

**Table S1.** Chemical composition of LLZO, LGLZO, and various LLZCO samples examined using ICP-MS.

| Sample     | Chemical formula                                                      | Li   | La    | Zr   | Ce    | Ga   |
|------------|-----------------------------------------------------------------------|------|-------|------|-------|------|
| LLZO       | $\text{Li}_7\text{La}_3\text{Zr}_2\text{O}_{12}$                      | 5.16 | 3.000 | 1.97 | NA    | NA   |
| LGLZO      | $\text{Li}_{6.25}\text{Ga}_{0.25}\text{La}_3\text{Zr}_2\text{O}_{12}$ | 4.18 | 3.000 | 2.00 | NA    | 0.28 |
| LLZCO-0.05 | $\text{Li}_7\text{La}_3\text{Zr}_{1.95}\text{Ce}_{0.05}\text{O}_{12}$ | 4.99 | 3.000 | 1.96 | 0.050 | NA   |
| LLZCO-0.10 | $\text{Li}_7\text{La}_3\text{Zr}_{1.90}\text{Ce}_{0.10}\text{O}_{12}$ | 5.02 | 3.000 | 1.90 | 0.095 | NA   |
| LLZCO-0.15 | $\text{Li}_7\text{La}_3\text{Zr}_{1.85}\text{Ce}_{0.15}\text{O}_{12}$ | 5.02 | 3.000 | 1.84 | 0.145 | NA   |

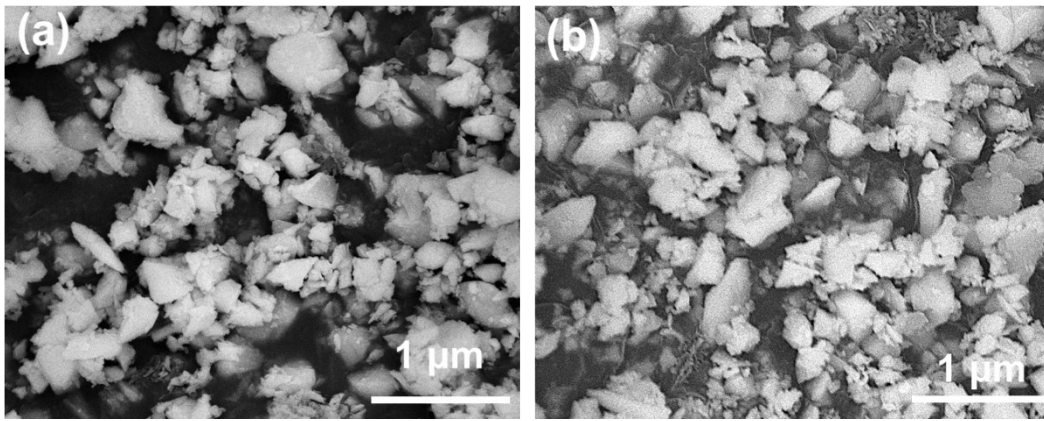

**Fig. S1.** SEM images of (a) LLZCO-0.05 and (b) LLZCO-0.15 samples.

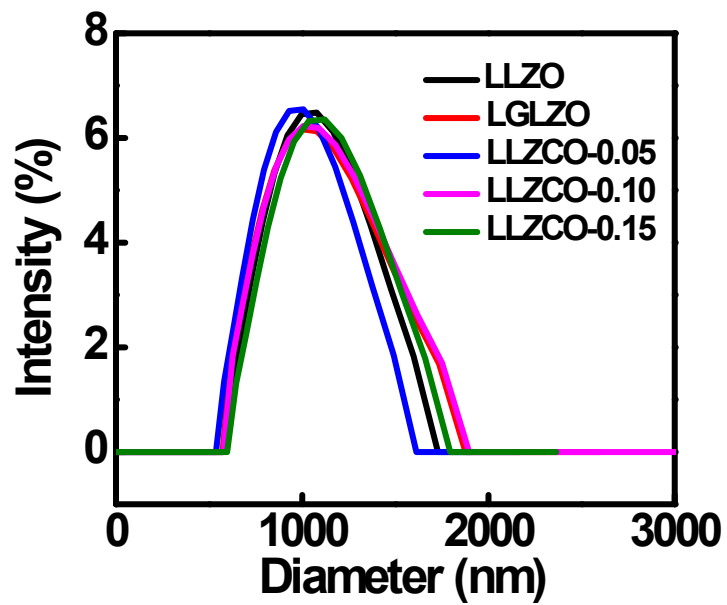

**Fig. S2.** DLS data of LLZO, LGLZO, and various LLZCO samples.

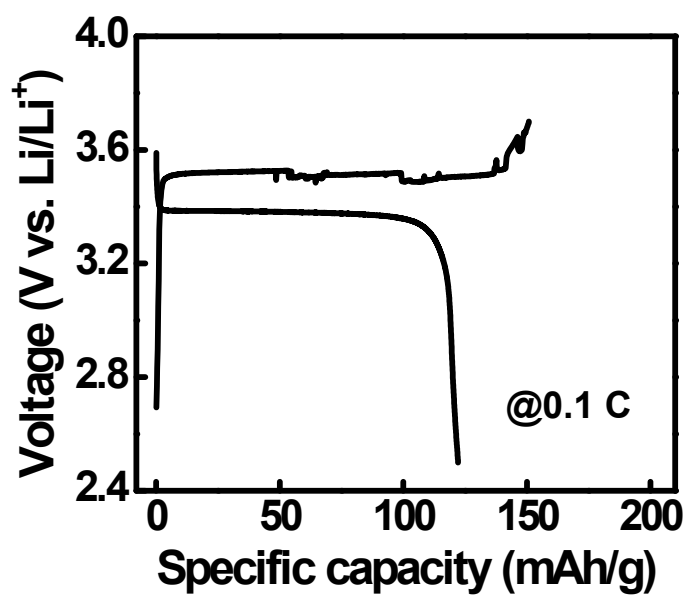

**Fig. S3.** Charge-discharge curves of Li//CSE//LFP cell with 25 wt.% LGLZO and EO/Li<sup>+</sup> molar ratio of 5 in CSE.

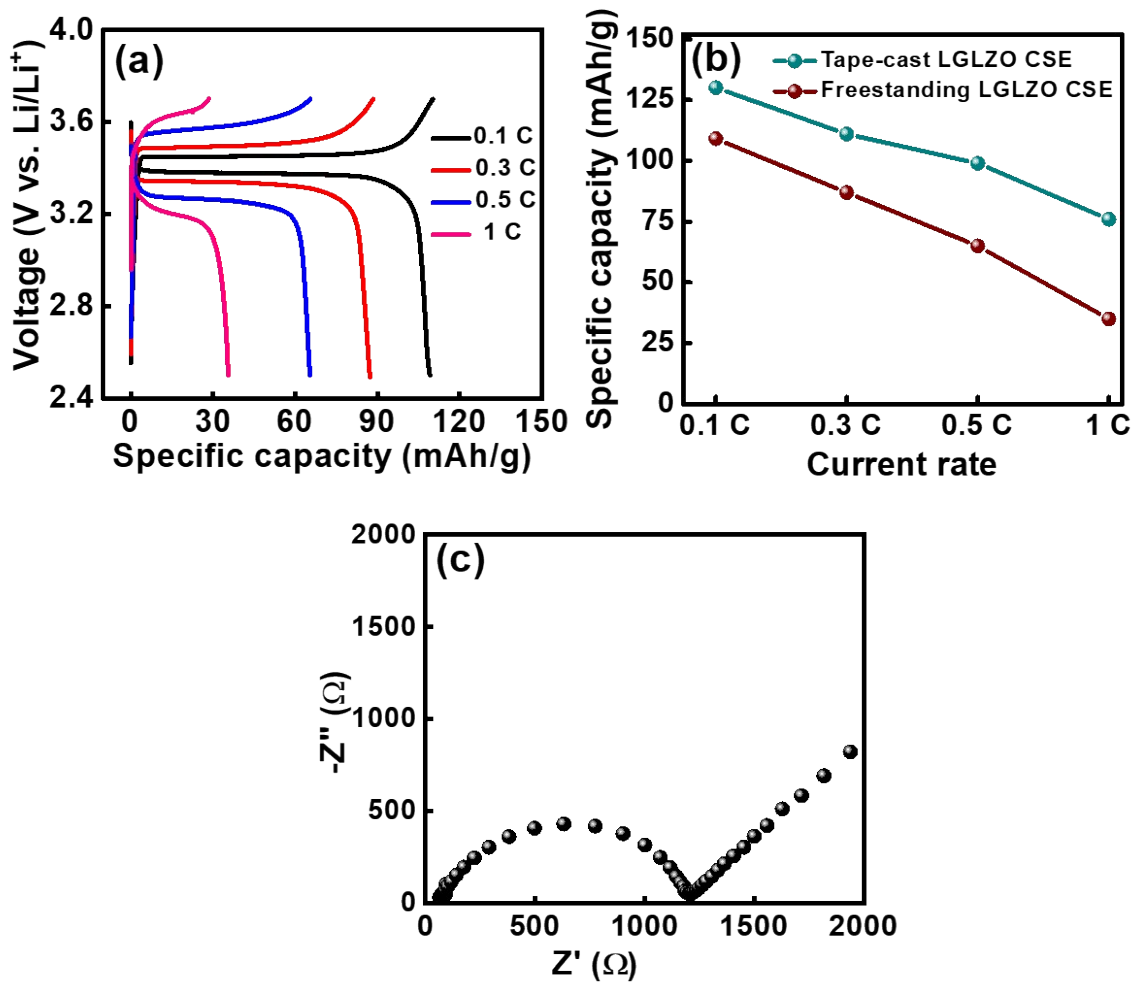

**Fig. S4.** (a) Charge-discharge curves of Li//LFP cell assembled with freestanding CSE. (b) Comparative rate performance of Li//LFP cells with freestanding and tape-cast CSE layers. (c) EIS spectra of Li//LFP cell assembled with freestanding CSE.

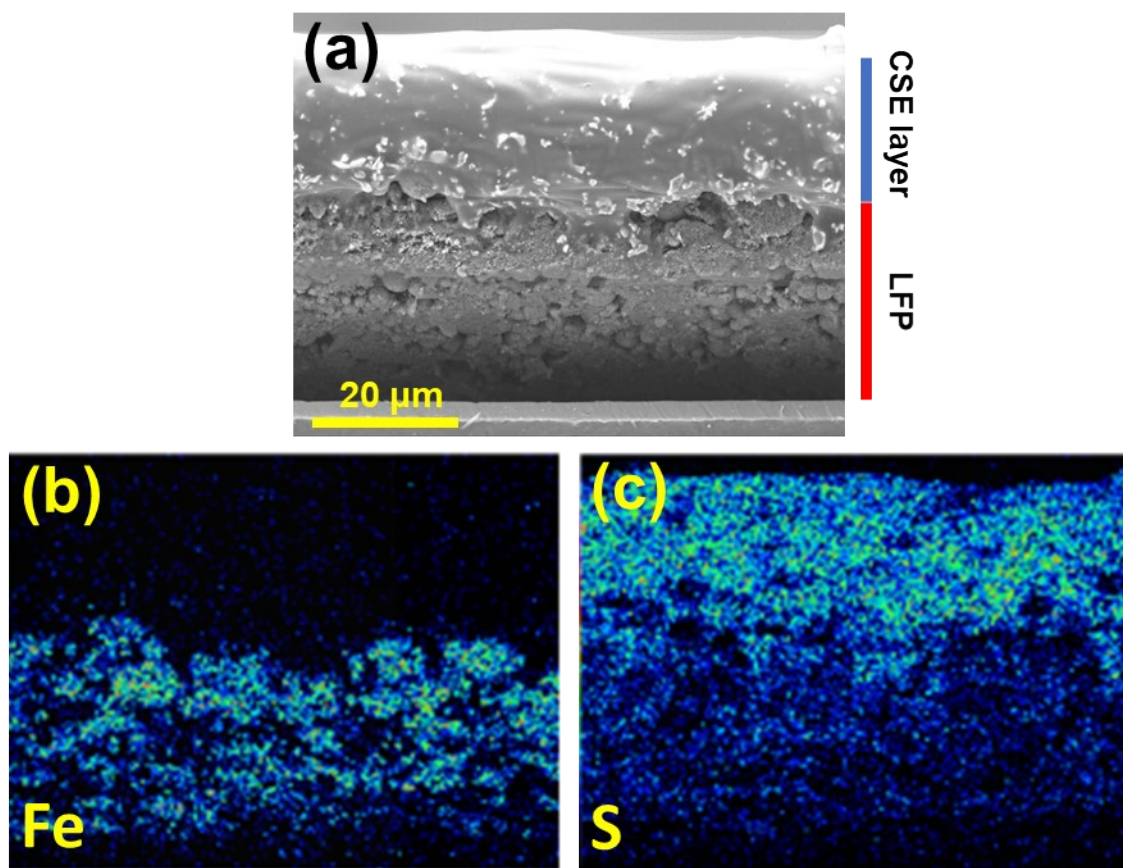

**Fig. S5.** (a) Cross-sectional SEM image of tape-cast CSE on LFP cathode. (b) The corresponding EDS Fe and S mapping in the same region.

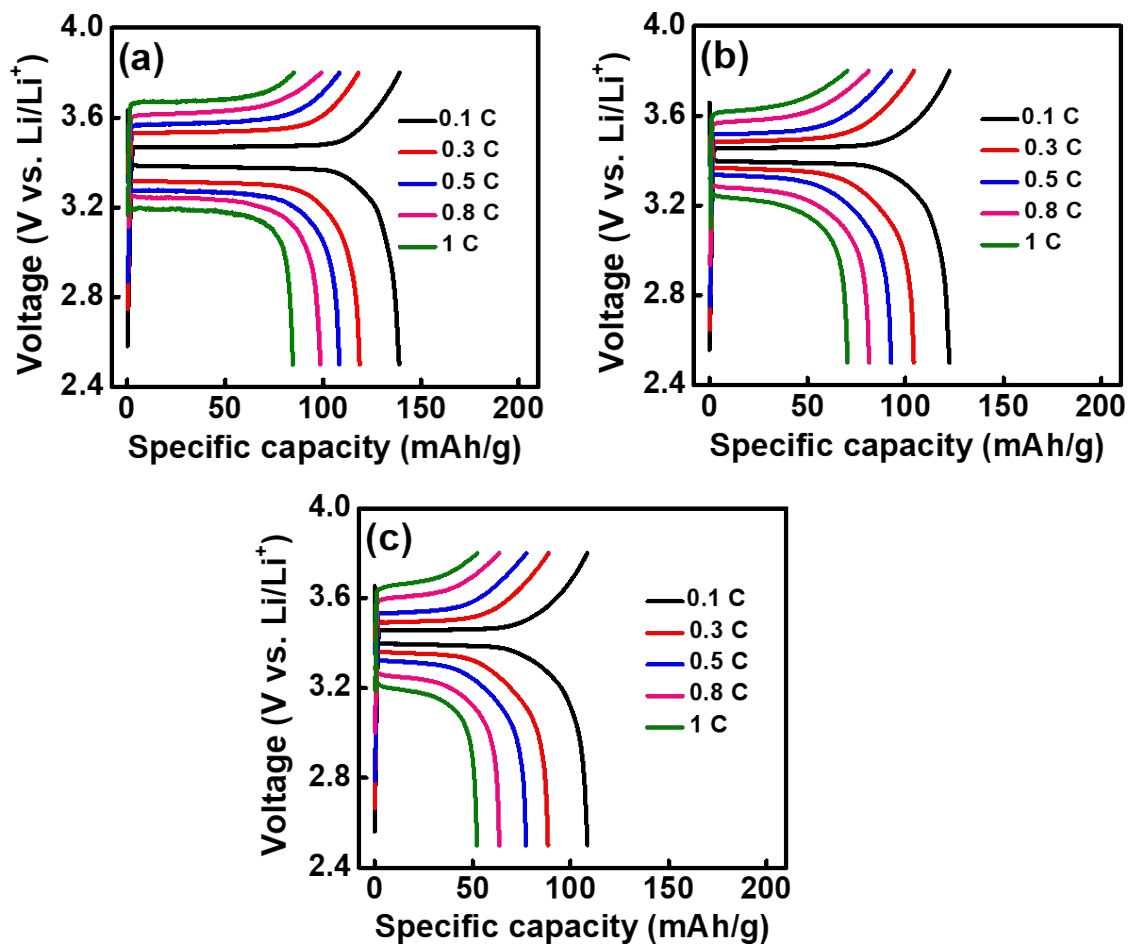

**Fig. S6.** Charge-discharge curves of Li//CSE (with EO/Li<sup>+</sup> = 10 and 35 wt.% LGLZO)//LFP cell with CSE thickness of (a) 20, (b) 50, and (c) 80 μm.

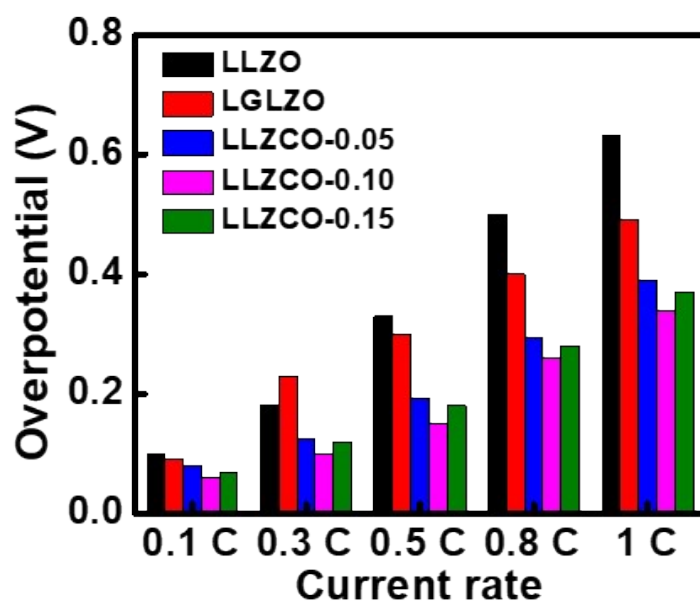

**Fig. S7.** Overpotential derived from charge-discharge curves (in **Fig. 7**) of Li//CSE//LFP cells with various CSEs.



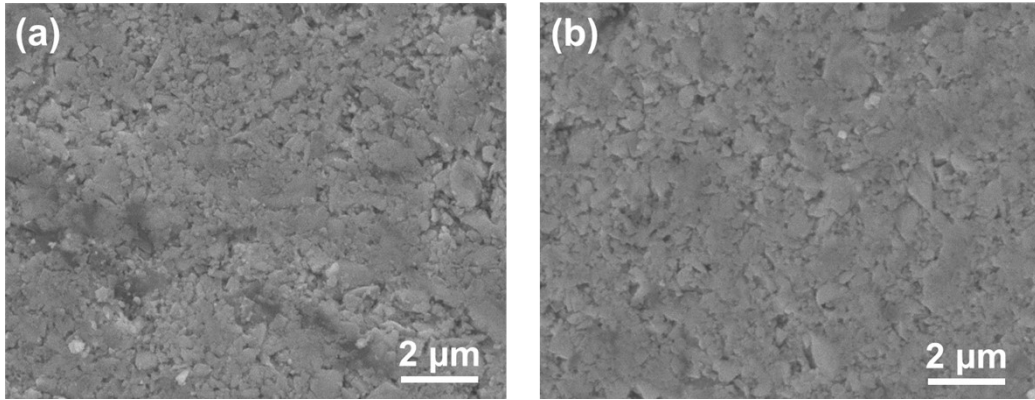

**Fig. S8.** SEM images of (a) LLZO (b) LLZCO-0.10 pellets after Li contact for 48 hours at 70 °C.

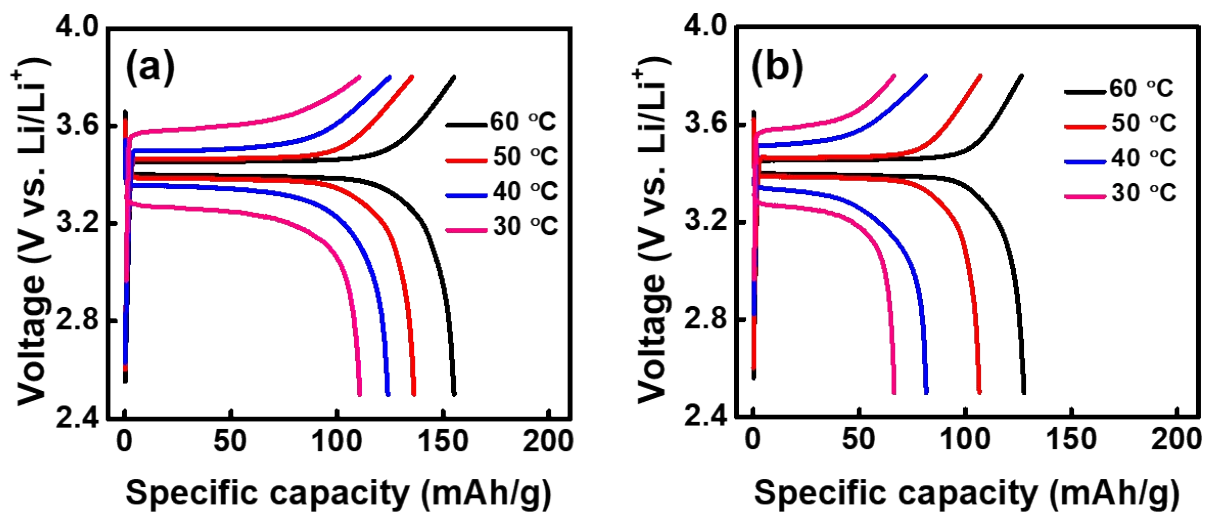

**Fig. S9.** Charge-discharge curves of Li//LLZCO-0.10 CSE//LFP cell measured at (a) 0.1 C and (b) 0.5 C at various temperatures.
